# Supplementary material
Source: publisher figshare collection journal article supplement (https://gsajournals.figshare.com/articles/dataset/_/6671753)
Supplement: Supplementary file 1 [file 2]

### File S1 - Constraints of Minor Allele Frequency on $F_{ST}$

Assuming all populations have the same size, we define  $p_i$  as the observed frequency of the minor allele in population  $i$ , and  $p = \frac{\sum_{i=1}^n p_i}{n}$  as the minor allele frequency over all  $n$  populations. To simplify calculations, here we analyzed the constraints of minor allele frequency on  $F_{ST}$  using the expected value of  $F_{ST}$ , instead of the [Weir and Cockerham \(1984\)](#)  $F_{ST}$  estimator used in the main text. The expected value of  $F_{ST}$  is defined by

$$F_{ST} = \frac{H_T - H_S}{H_T}, \quad (1)$$

where  $H_T$  is the heterozygosity in the total population and  $H_S$  is the average heterozygosity within subpopulations, defined by

$$H_T = 2p(1 - p) \quad H_S = \frac{\sum_{i=1}^n 2p_i(1 - p_i)}{n}. \quad (2)$$

Maximum  $F_{ST}$  for a given  $p$  is achieved when  $H_S$  is minimal. This happens when all occurrences of the minor allele are concentrated in as few populations as possible and only one population is polymorphic at that site ([Alcala and Rosenberg 2017](#)), i.e. when  $\lfloor pn \rfloor$  populations are fixed for the minor allele, and the remainder of minor alleles are all in the same population, with frequency  $p^* = pn - \lfloor pn \rfloor$ . (The notation  $\lfloor \cdot \rfloor$  represents the integer part of the number  $pn$ ).

All populations that are fixed for either the minor or major allele will not contribute to  $H_S$ , since either  $p_i$  or  $1 - p_i$  will be zero. So the  $H_S$  formula in the scenario of maximum  $F_{ST}$  can be simplified to

$$H_{S_{maxF_{ST}}} = \frac{2p^*(1 - p^*)}{n}. \quad (3)$$

For example, with  $n = 10$  populations and MAF of  $p = 0.15$ , maximum  $F_{ST}$  will be achieved when  $\lfloor 1.5 \rfloor = 1$  population is fixed for the minor allele, 1 population has  $MAF = p^* = 1.5 - 1 = 0.5$ , and the remainder 8 populations are fixed for the major allele. In this case, maximum  $F_{ST}$  is 0.8.

To illustrate this constraint imposed by MAF on  $F_{ST}$ , we simulated the neutral evolution of SNPs in 10 populations, with virtually no migration among them, allowing SNPs to achieve maximum differentiation among populations. Simulations were performed using the *sim.genot* function of the hierfstat R package ([Goudet 2005](#)). We simulated the neutral evolution of 10,000 bi-allelic loci (SNPs) in 10 populations, each with population size 1000, migration rate of  $m = 10^{-5}$  and mutation rate of  $\mu = 10^{-8}$ , and we used sample sizes of 50, 100 or 1000 individuals. Results were independent of sample size. The low migration rate allowed SNPs to achieve maximum  $F_{ST}$  values possible given their MAF. Figure S1 shows the  $F_{ST}$  of 10,000 simulated SNPs as a function of their MAFs, as well as the maximum  $F_{ST}$  values estimated by replacing the observed values by the expected one in Equations 1-3.

Figure S1 shows that, when all subpopulations are the same size (in the case of Figure S1,  $n = 10$ ),  $F_{ST}$  only achieves 1 when MAF is exactly  $m \in \{1/n, 2/n, \dots, 1/2\}$ . This is because  $F_{ST}$  can only achieve 1 when  $H_S$  is zero, and  $H_S$  can only be exactly zero when all populations are fixed for either the minor or major allele. Maximum values of  $F_{ST}$  increase linearly from zero to one as MAF increases from zero to  $1/n$ . When MAF is between the values of  $m$ , maximum  $F_{ST}$  is less than 1, which generates the wavy pattern seen in Figure S1.

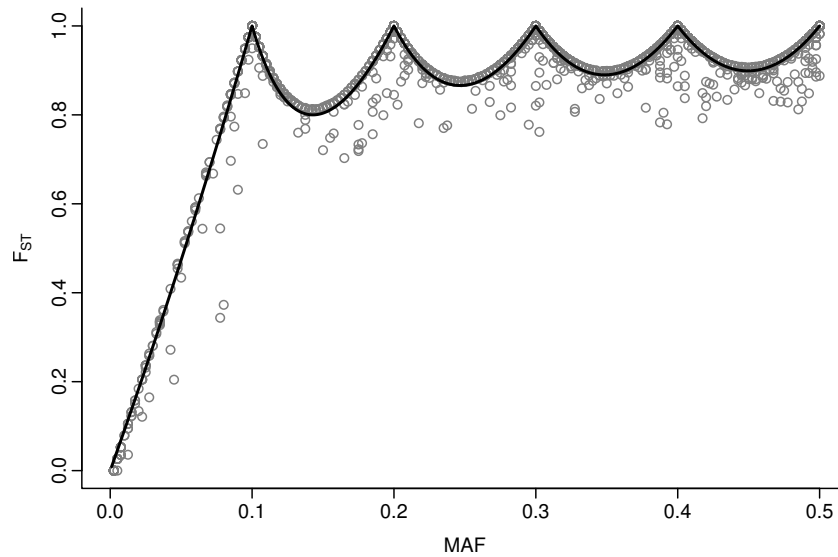

**Figure S1** Maximum  $F_{ST}$  as a function of MAF for  $n = 10$  populations. Black line shows maximum  $F_{ST}$  as a function of MAF, calculated using Equations 1-3. Gray points are simulations of biallelic SNPs evolving neutrally in 10 populations of the same size, with low migration among them, which allows them to achieve maximum  $F_{ST}$ .

## Literature Cited

- Alcala, N. and N. A. Rosenberg, 2017 Mathematical constraints on  $F_{ST}$ : biallelic markers in arbitrarily many populations. *Genetics* **206**: 1581–1600.
- Goudet, J., 2005 Hierfstat, a package for R to compute and test hierarchical F-statistics. *Molecular Ecology Notes* **5**: 184–186.
- Weir, B. S. and C. C. Cockerham, 1984 Estimating F-statistics for the analysis of population structure. *Evolution* **38**: 1358–1370.
