# Supplementary material
Source: publisher figshare collection journal article supplement (https://gsajournals.figshare.com/articles/dataset/_/6671753)
Supplement: Supplementary file 3 [file 2]

## **Extended Materials and Methods - Modification of VCFtools to provide variance components of $F_{ST}$**

VCFtools v0.1.14 source file `variant_file_output.cpp` available at [https://github.com/vcftools/vcftools/blob/master/src/cpp/variant\\_file\\_output.cpp](https://github.com/vcftools/vcftools/blob/master/src/cpp/variant_file_output.cpp) was modified so that the output of `-weir-fst-pop` command includes the numerator and denominator of [Weir and Cockerham \(1984\)](#)  $F_{ST}$  estimator, allowing to calculate average  $F_{ST}$  over multiple sites appropriately, as a ratio of averages, as suggested by ([Reynolds \*et al.\* 1983](#)) and described in the main text.

Line 3628 of `variant_file_output.cpp` was originally:

```
out << e->get_CHROM() << "\t" << e->get_POS() << "\t" << fst << endl;
```

We modified it to:

```
out << e->get_CHROM() << "\t" << e->get_POS() << "\t" << fst << "\t" << sum_a  
<< "\t" << sum_all << endl;
```

Following a suggestion by Travis Collier on the VCFtools mailing list (<http://sourceforge.net/p/vcftools/mailman/message/33927517/>).

## **Literature Cited**

Reynolds, J., B. S. Weir, and C. C. Cockerham, 1983 Estimation of the coancestry coefficient: basis for a short-term genetic distance. *Genetics* **105**: 767–79.

Weir, B. S. and C. C. Cockerham, 1984 Estimating F-statistics for the analysis of population structure. *Evolution* **38**: 1358–1370.
